# Supplementary material for: Individual modelling of haematotoxicity with NARX neural networks: A knowledge transfer approach
Source: PubMed Central journal article supplement (PMC10362198; doi:10.1016/j.heliyon.2023.e17890), 2023-07-05
Supplement: mmc1.pdf [file mmc1.pdf]

## Supplemental material

### S1. Flowchart of analysis

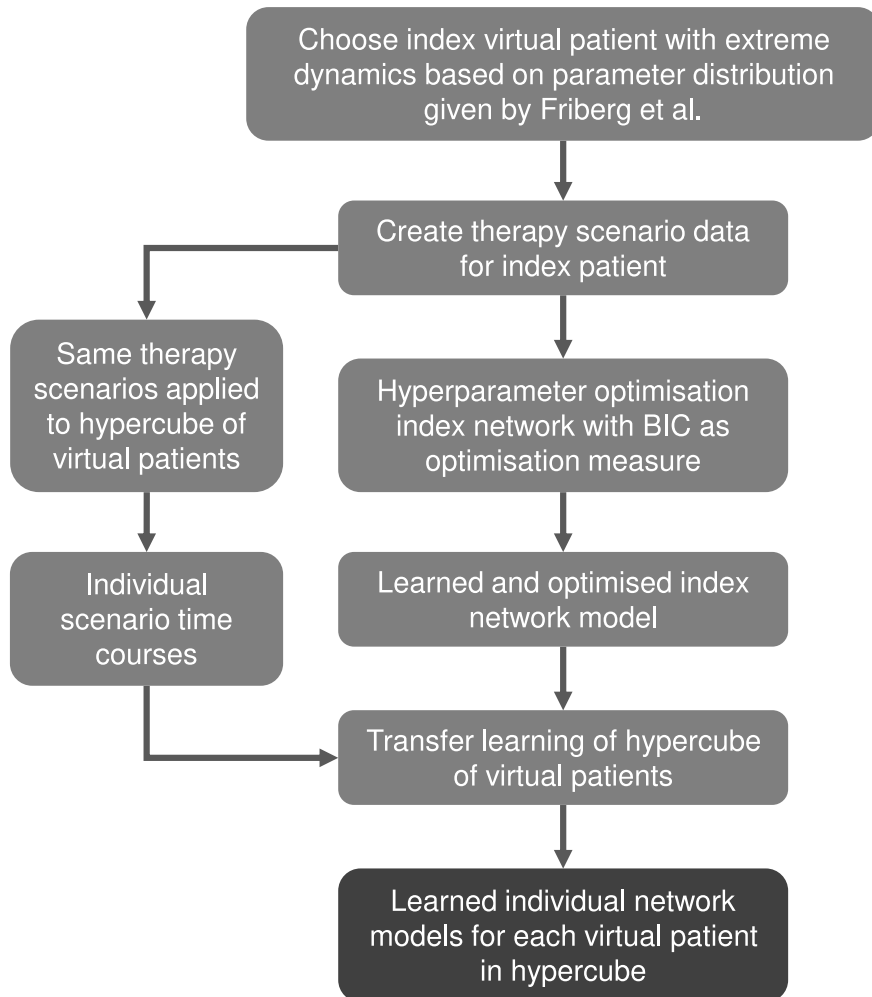

Figure S.1: Flowchart of approach to individualised network models for patient population

## S2. Treatment scenarios

### S2.1. Code for scenario creation

```

seeds (therapy_dates, dosages):
array([[3356737, 4913634, 2965200, 2875040, 1800356, 1683633,
1135631 684210, 1308554, 6687090, 298367, 1824443, 6615170,
4987257, 6772834, 6741566, 861091, 1145566],
[4696088, 9284172, 924207, 4938981, 9804438, 4656330, 7243077,
44631, 7075963, 8497091, 4577874, 838371, 7822484, 4966962,
818217, 7420609, 4643876, 1609814]])

code:
# storage array
therapies = np.zeros((10,2,6))
# possible ratio values
geom = np.around(np.geomspace(0.25, 4.,17, endpoint=True), 2)
# fill storage array
for i in range(10):
    # therapy days
    np.random.seed(seed[0,i])
    therapies[i,0] = np.sort(np.random.choice(np.arange(4,43) * 7,
6, replace=False))
    # dosage
    np.random.seed(seed[1,i])
    therapies[i,1] = np.random.choice(geom,6, replace=False)

```

**Table S.1**

**Treatment scenarios:** treatment administration day refers to the number of days after the start of observation, where treatment is administered. The dosage refers to the ratio of the standard dosage of 375 mg/m<sup>2</sup>. Treatment days and dosages are drawn randomly with constraints, see code implementation.

| Scenario | Therapy Administration Day Dosage |     |     |     |     |     |     |      |      |      |      |      |      |      |
|----------|-----------------------------------|-----|-----|-----|-----|-----|-----|------|------|------|------|------|------|------|
|          | 1                                 | 49  | 63  | 91  | 140 | 266 | 280 | 0.59 | 2.83 | 1.19 | 0.35 | 3.36 | 0.50 |      |
| Training | 2                                 | 84  | 105 | 133 | 189 | 210 | 245 | 0.71 | 1.41 | 0.35 | 0.84 | 4.00 | 3.36 |      |
|          | 3                                 | 35  | 56  | 84  | 105 | 154 | 161 | 2.38 | 3.36 | 1.19 | 2.00 | 0.71 | 0.84 |      |
|          |                                   | 4   | 42  | 77  | 168 | 189 | 231 | 252  | 0.71 | 0.25 | 2.38 | 1.19 | 0.42 | 1.00 |
|          | 5                                 | 70  | 161 | 168 | 203 | 210 | 273 | 0.71 | 0.42 | 1.68 | 2.00 | 1.19 | 0.84 |      |
|          |                                   | 6   | 56  | 84  | 98  | 147 | 210 | 280  | 0.59 | 0.50 | 2.83 | 0.25 | 1.41 | 1.19 |
|          | Validation                        | 7   | 28  | 42  | 91  | 189 | 224 | 231  | 1.41 | 1.19 | 0.35 | 2.83 | 0.25 | 3.36 |
| 8        |                                   |     | 35  | 77  | 112 | 119 | 210 | 266  | 0.71 | 4.00 | 0.30 | 2.00 | 1.68 | 0.42 |
| 9        |                                   |     | 35  | 56  | 63  | 154 | 259 | 287  | 0.50 | 4.00 | 0.84 | 0.35 | 0.59 | 2.83 |
| Testing  | 10                                | 35  | 84  | 98  | 161 | 252 | 294 | 0.50 | 3.36 | 1.00 | 1.41 | 0.25 | 2.38 |      |
|          |                                   | 11  | 49  | 77  | 84  | 119 | 210 | 231  | 0.42 | 1.68 | 2.83 | 2.00 | 0.35 | 0.84 |
|          | 12                                | 182 | 189 | 231 | 245 | 266 | 280 | 0.84 | 0.71 | 0.50 | 2.00 | 0.42 | 4.00 |      |
|          |                                   | 13  | 28  | 35  | 56  | 105 | 126 | 182  | 4.00 | 3.36 | 2.83 | 1.41 | 0.35 | 1.00 |
|          | 14                                | 35  | 119 | 140 | 154 | 175 | 182 | 0.84 | 4.00 | 0.25 | 0.71 | 0.35 | 0.59 |      |
|          |                                   | 15  | 49  | 105 | 119 | 126 | 154 | 273  | 2.83 | 0.30 | 4.00 | 0.42 | 1.41 | 0.59 |
|          | 16                                | 56  | 126 | 231 | 252 | 259 | 273 | 1.00 | 0.59 | 0.50 | 4.00 | 0.71 | 0.30 |      |
|          |                                   | 17  | 28  | 77  | 126 | 133 | 168 | 252  | 0.50 | 2.83 | 0.59 | 3.36 | 4.00 | 0.42 |
|          | 18                                | 35  | 42  | 77  | 133 | 154 | 287 | 1.00 | 0.30 | 4.00 | 0.35 | 3.36 | 0.71 |      |
|          |                                   |     |     |     |     |     |     |      |      |      |      |      |      |      |

### S3. Performance plots extreme virtual patient

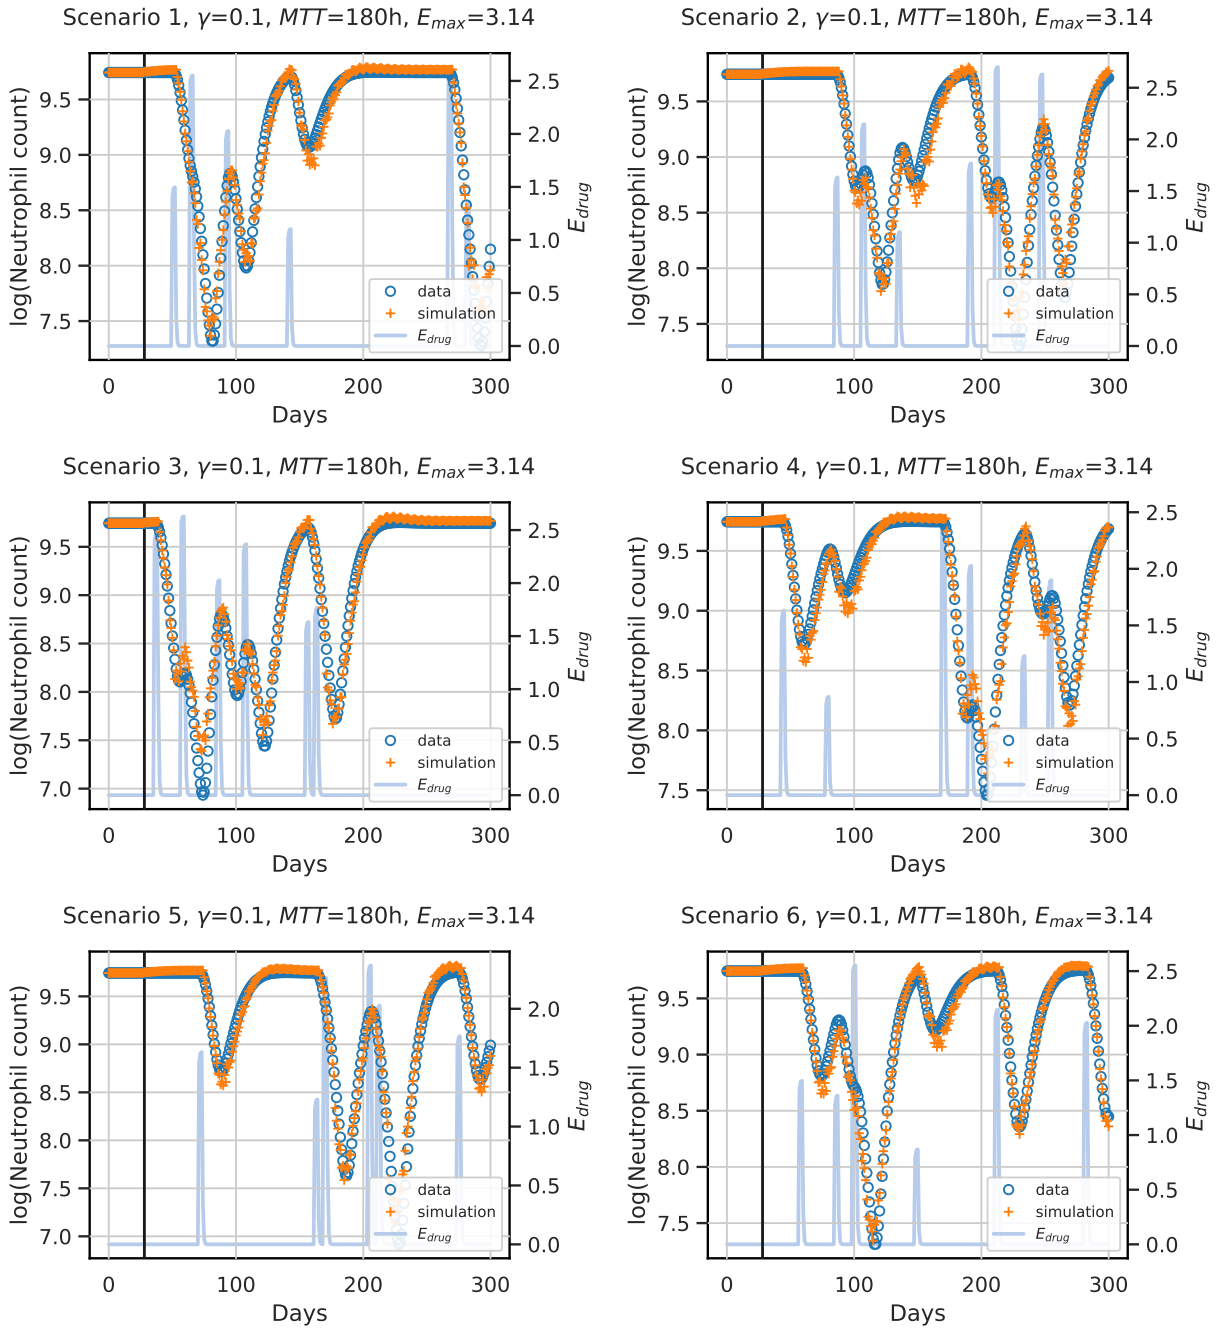

Figure S.2: Scenarios 1-6

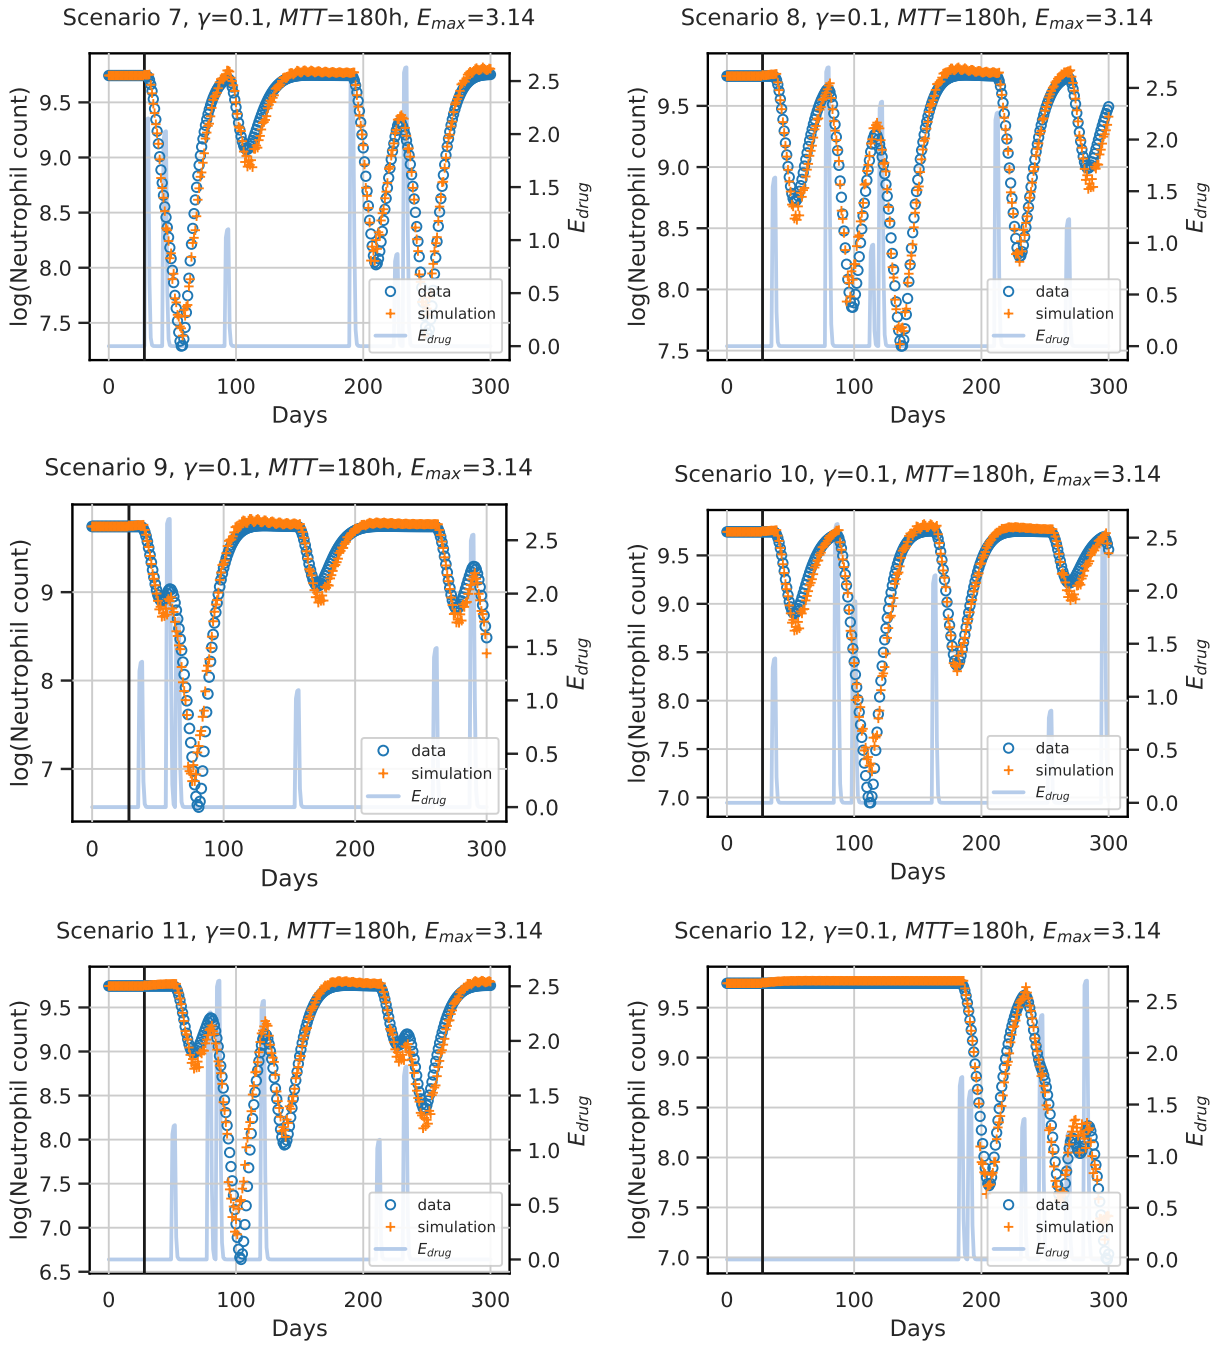

Figure S.2: Scenarios 7-12

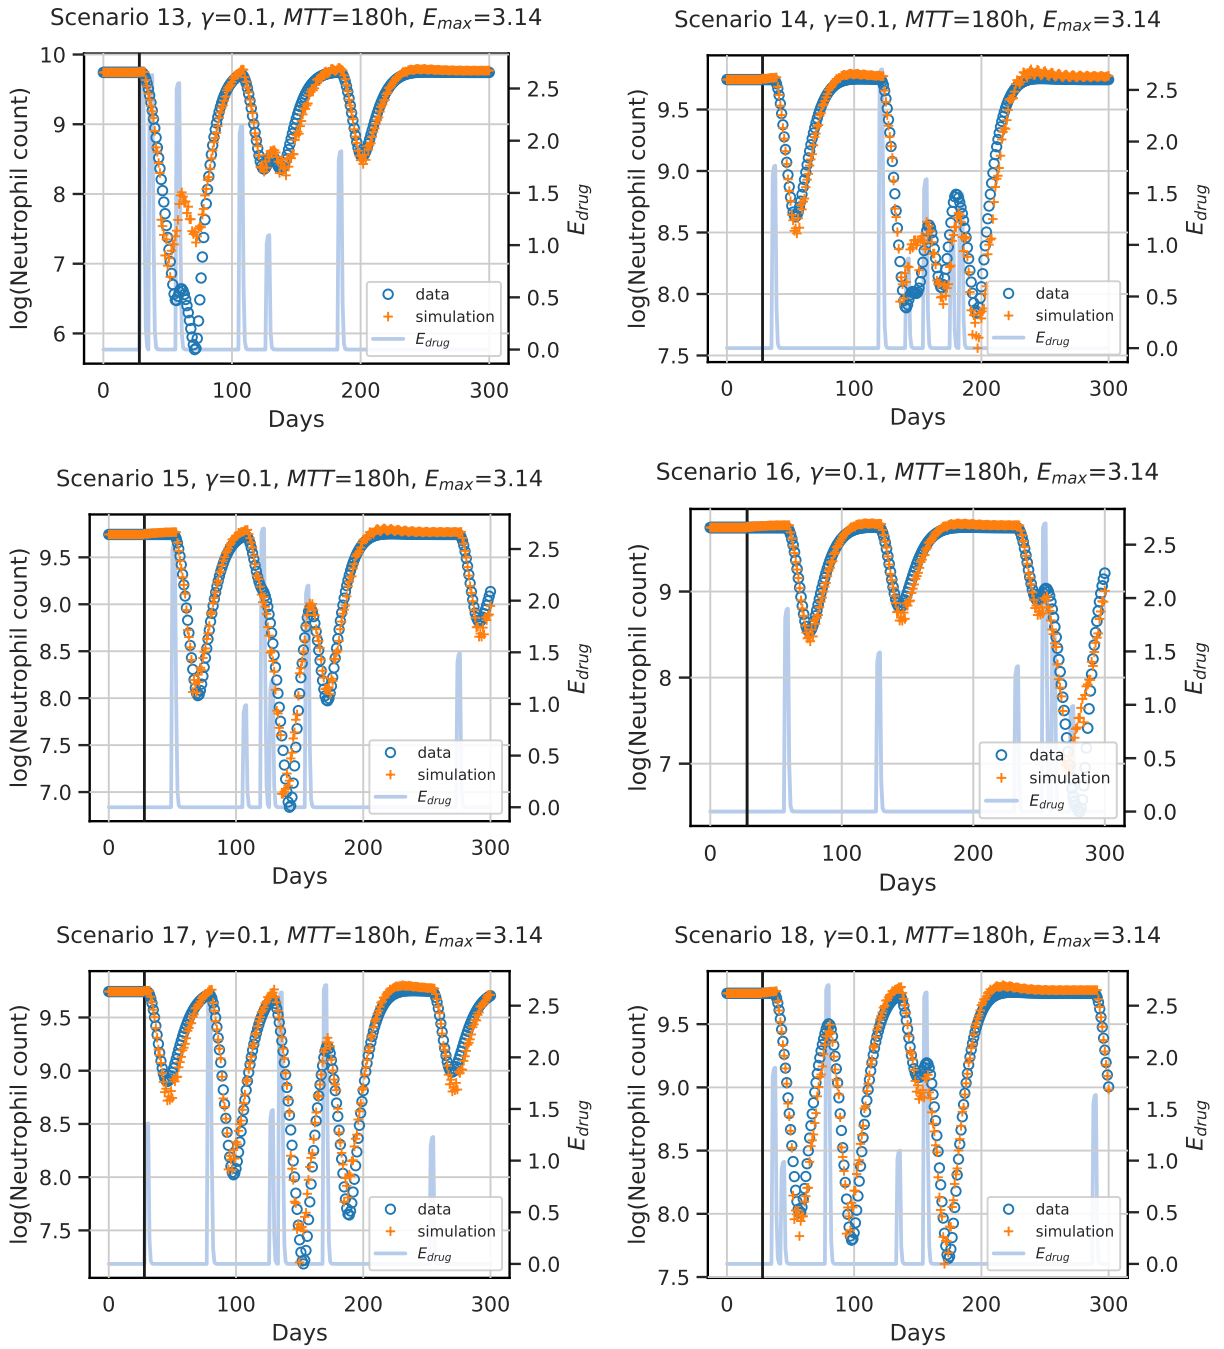

Figure S.2: Scenarios 13-18
